# Supplementary material for: Modeling the Impact of Vaccination on COVID-19 and Its Delta and Omicron Variants
Source: MDPI journal article supplement (doi:10.3390/v14071482), 2022-07-06
Supplement: s1 [file s1]

Supplementary Materials for

# **Modeling the Impact of Vaccination on COVID-19 and its Delta Variant**

Jianbo Wang<sup>1,2</sup>, Yin-Chi Chan<sup>1,3</sup>, Ruiwu Niu<sup>3</sup>, Eric W. M. Wong<sup>1,\*</sup>, and  
Michaël Antonie van Wyk<sup>1,5</sup>

<sup>1</sup>Department of Electrical Engineering, City University of Hong Kong, Hong Kong, China

<sup>2</sup>School of Computer Science, Southwest Petroleum University, Chengdu, China

<sup>3</sup>Institute for Manufacturing, University of Cambridge, Cambridge, United Kingdom

<sup>4</sup>College of Mathematics and Statistics, Shenzhen University, Shenzhen 518060, China

<sup>5</sup>School of Electrical and Information Engineering, University of the Witwatersrand at  
Johannesburg, Johannesburg 2000, South Africa

## **Supplementary Figures**

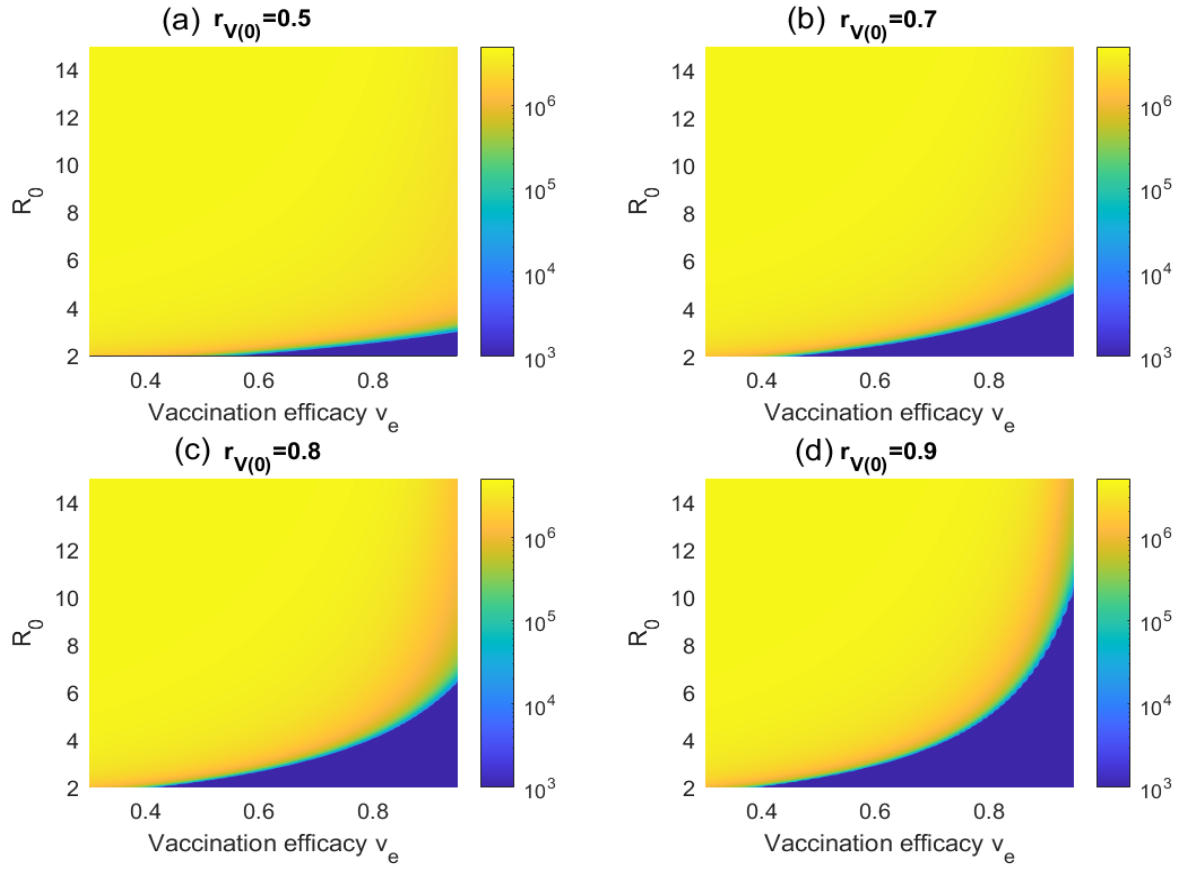

**Figure S1:** Cumulative hospitalizations  $H_c(\infty)$  with respect to  $R_0$  and the vaccine efficacy  $v_e$ , for a simulated Delta outbreak in Hong Kong and NPIs ( $c = 0.2$ ).

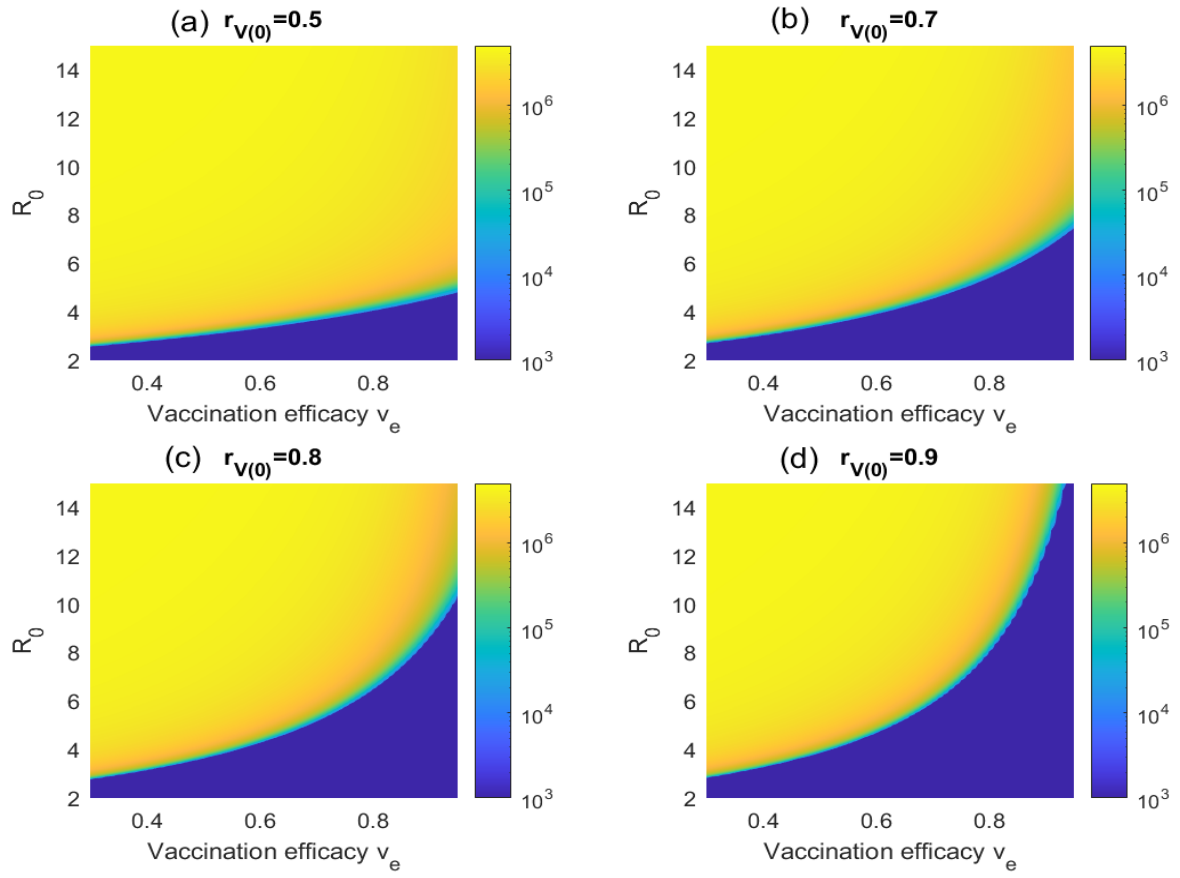

**Figure S2:** Cumulative hospitalizations  $H_c(\infty)$  with respect to  $R_0$  and the vaccine efficacy  $v_e$ , for a simulated Delta outbreak in Hong Kong and NPIs ( $c = 0.5$ ).

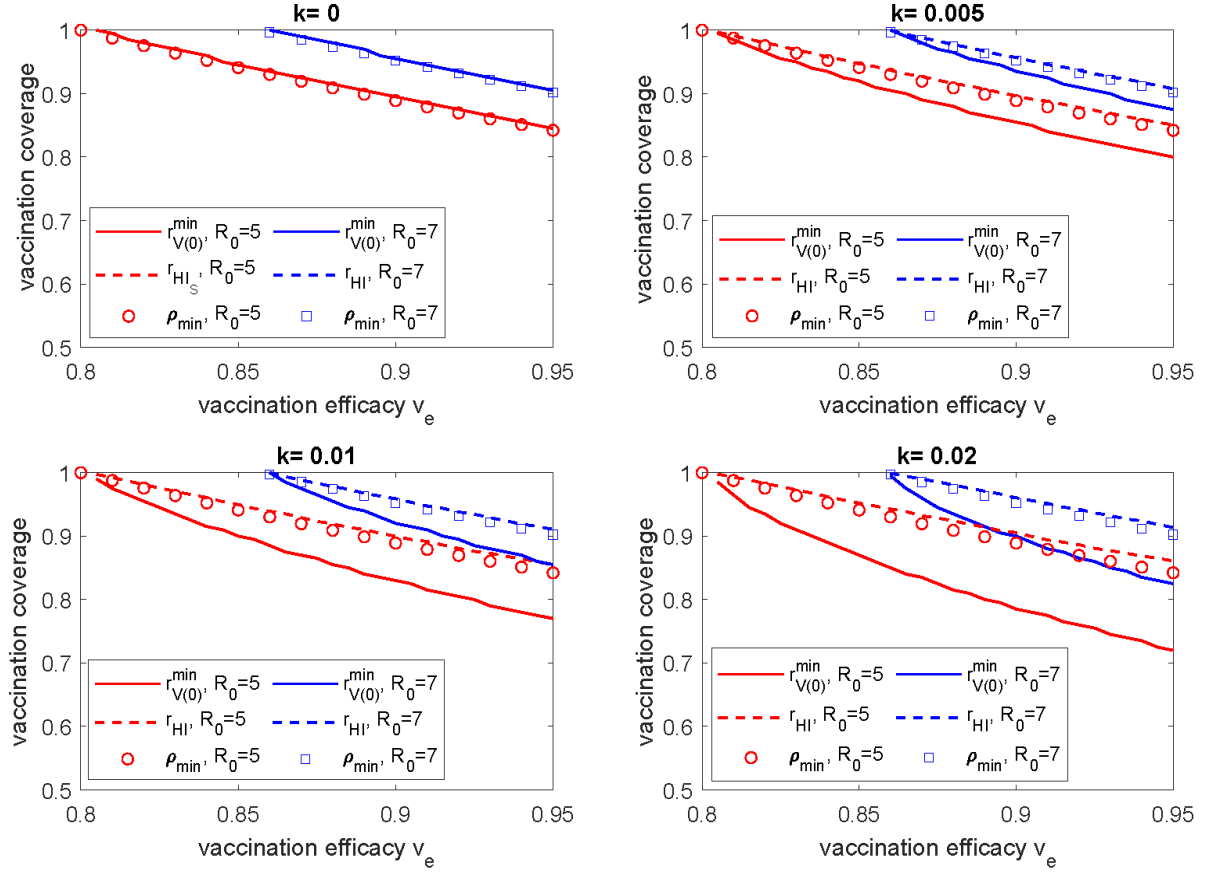

**Figure S3:** Minimum vaccination threshold required such that the cumulative number of hospitalizations is less than  $10^{-4}N$ , for different vaccine efficacies  $v_e$  and vaccination rates  $k$ , and no NPIs ( $c = 0$ ). The theoretical herd immunity threshold  $\rho_{\min}$  is also shown.

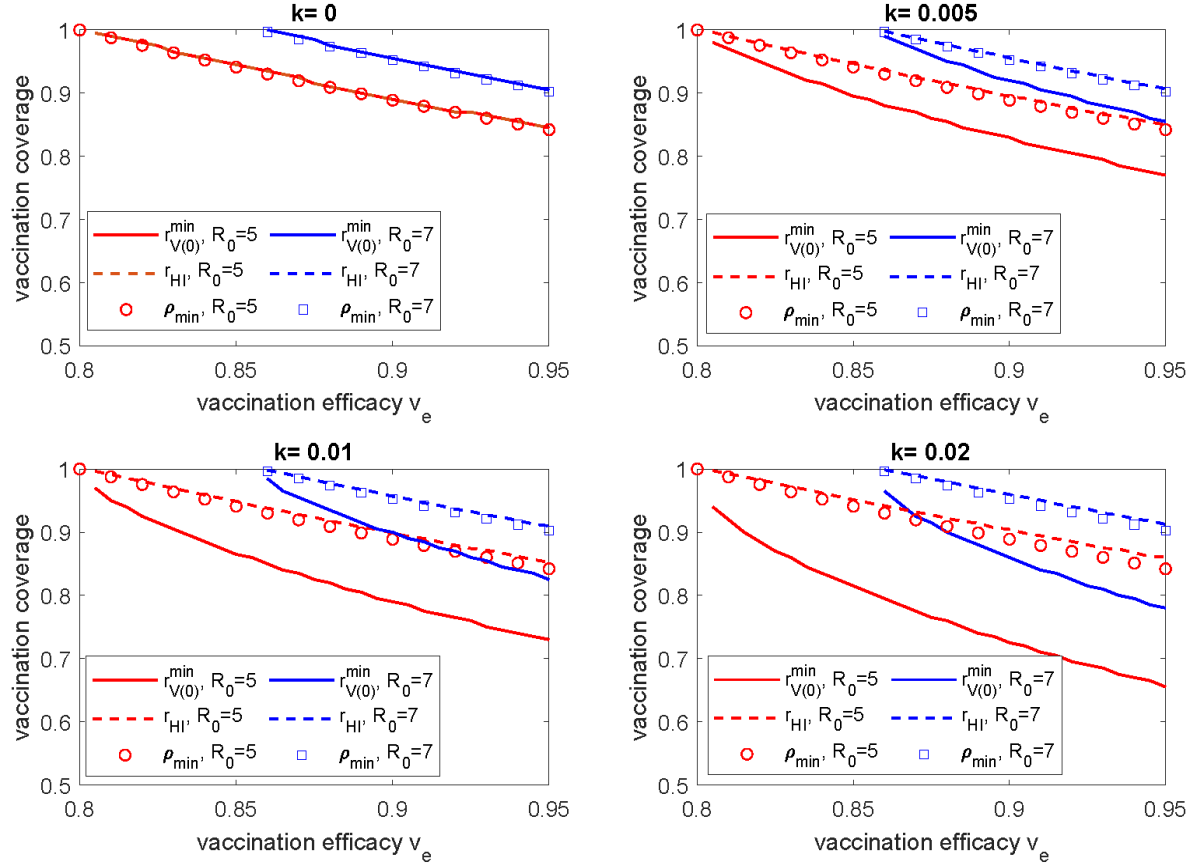

**Figure S4:** Minimum vaccination threshold required such that the cumulative number of hospitalizations is less than  $10^{-3}N$ , for different vaccine efficacies  $v_e$  and vaccination rates  $k$ , and no NPIs ( $c = 0$ ). The theoretical herd immunity threshold  $\rho_{min}$  is also shown.
